# Supplementary material for: Predicting Subtype Selectivity for Adenosine Receptor Ligands with Three-Dimensional Biologically Relevant Spectrum (BRS-3D)
Source: PubMed Central journal article supplement (PMC5095671; doi:10.1038/srep36595), 2016-11-04
Supplement: srep36595-s1.pdf [file srep36595-s1.pdf]

Supplementary Information

# **Predicting Subtype Selectivity for Adenosine Receptor Ligands with Three-Dimensional Biologically Relevant Spectrum (BRS-3D)**

*Song-Bing He<sup>1,2</sup>, Ben Hu<sup>3</sup>, Zheng-Kun Kuang<sup>3</sup>, Dong Wang<sup>2</sup>, De-Xin Kong<sup>1,3,\*</sup>*

<sup>1</sup>State Key Laboratory of Agricultural Microbiology, Huazhong Agricultural University, Wuhan 430070, China

<sup>2</sup>College of Life Science and Technology, Huazhong Agricultural University, Wuhan 430070, China

<sup>3</sup>Agricultural Bioinformatics Key Laboratory of Hubei Province, College of Informatics, Huazhong Agricultural University, Wuhan 430070, China

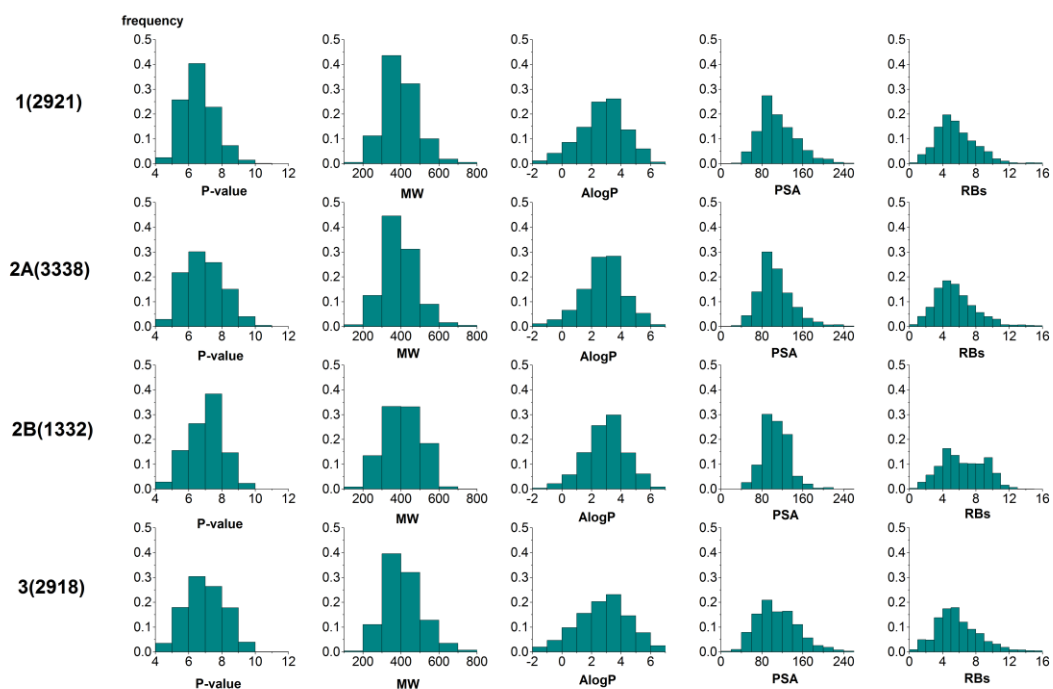

**Figure S1.** Activity and physicochemical properties (MW, AlogP, PSA, RBs) of the AR subtype active compounds. P-value: biological activity in pKi; MW: molecular weight; AlogP: the octanol/water partition coefficient; PSA: polar surface area; RBs: the number of rotatable bonds. All the physicochemical properties were calculated by Pipeline Pilot 8.5.

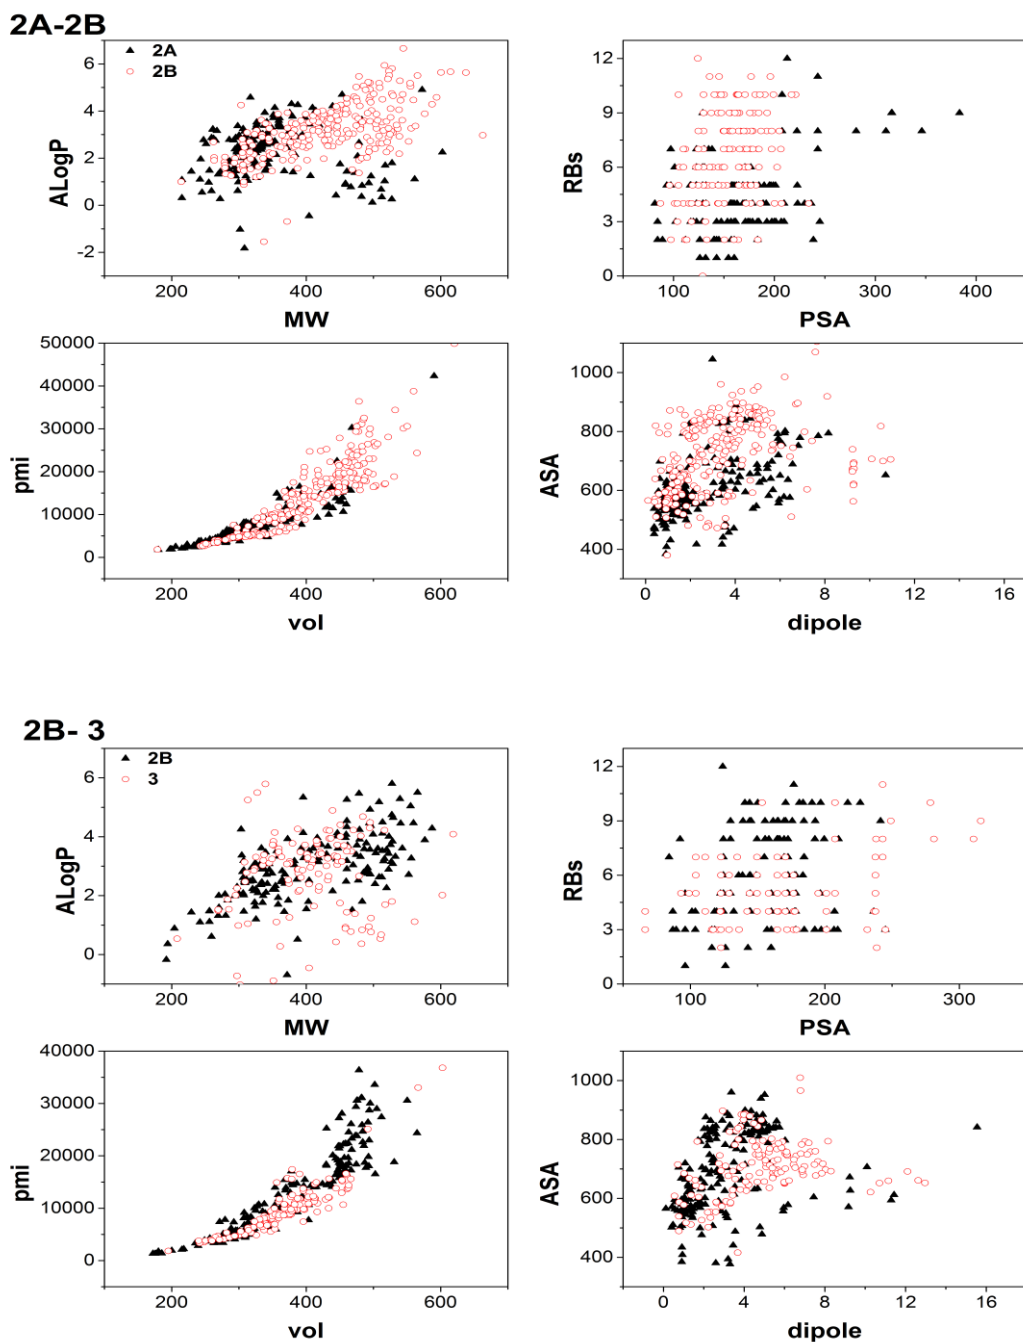

**Figure S2.** Distribution of the ligands in the physico-chemical property spaces for the 2A-2B and 2B-3 models. Activity and physicochemical properties: MW, AlogP, RBs, PSA; Typical MOE-3D molecular descriptors: vol, pmi, dipole, ASA. Each of these two subtype pairs can be distinguished with BRS-3D descriptors.

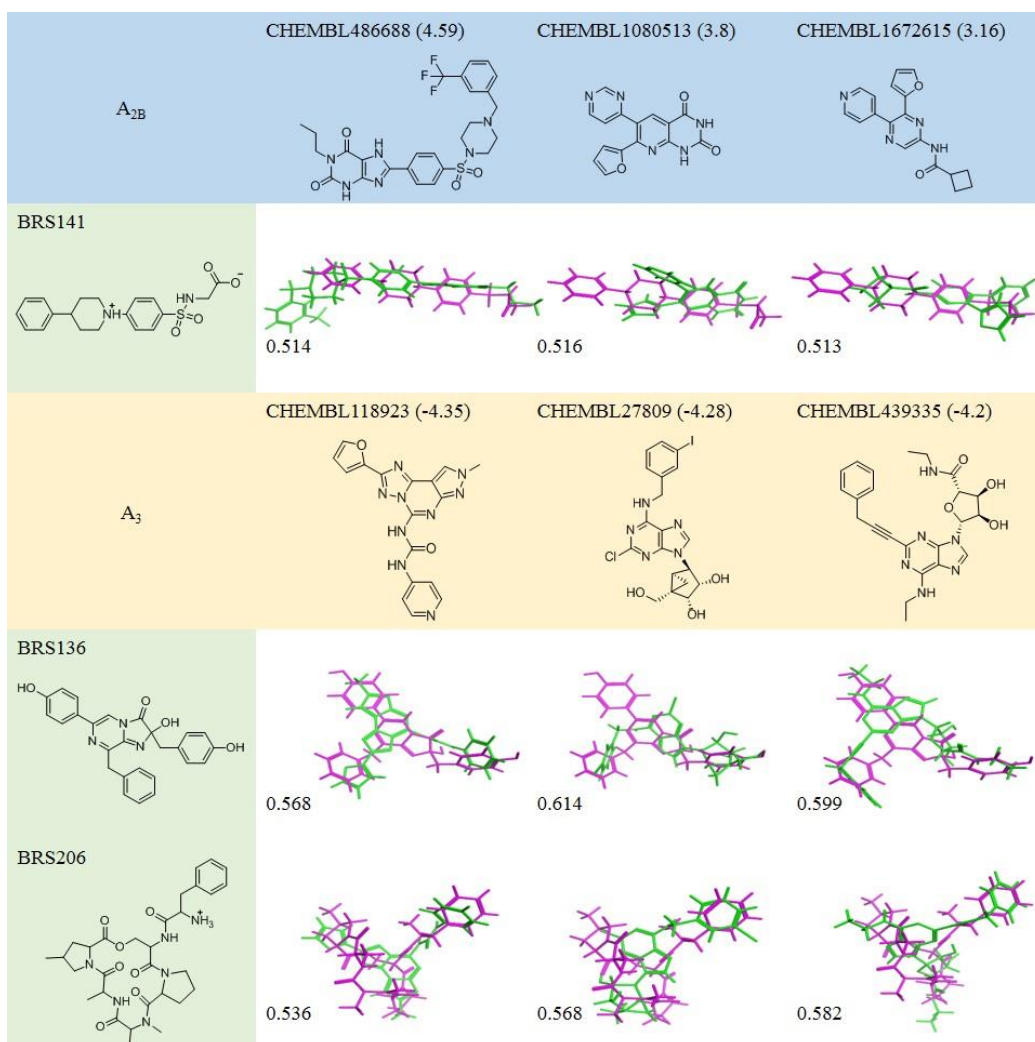

**Figure S3.** The superimposing conformations of the three most selective compounds of 2B-3 subtype pairs (green) with the corresponding BRCD-3D ligands of the most important features (purple). The values at the left bottom of alignment are the superimposition scores. The values in the bracket are the selectivity ratios of compounds.

**Table S1.** 3D molecular descriptors calculated by MOE.

| Class | Types                                      | N <sup>a</sup> | Descriptors                                                                                                                                                                                                                                                                                                                                                                                                                                                                                                                                                                                                                                                                                                                                                                                                                                                             |
|-------|--------------------------------------------|----------------|-------------------------------------------------------------------------------------------------------------------------------------------------------------------------------------------------------------------------------------------------------------------------------------------------------------------------------------------------------------------------------------------------------------------------------------------------------------------------------------------------------------------------------------------------------------------------------------------------------------------------------------------------------------------------------------------------------------------------------------------------------------------------------------------------------------------------------------------------------------------------|
| 3D    | Surface Area, Volume and Shape Descriptors | 91             | ASA,dens,glob,npr1,npr2,pmi,pmi1,pmi2,pmi3,rgyr,std_dim1,std_dim2,std_dim3,vol,VSA,vsurf_A,vsurf_CP,vsurf_CW1,vsurf_CW2,vsurf_CW3,vsurf_CW4,vsurf_CW5,vsurf_CW6,vsurf_CW7,vsurf_CW8,vsurf_D1,vsurf_D2,vsurf_D3,vsurf_D4,vsurf_D5,vsurf_D6,vsurf_D7,vsurf_D8,vsurf_DD12,vsurf_DD13,vsurf_DD23,vsurf_DW12,vsurf_DW13,vsurf_DW23,vsurf_EDmin1,vsurf_EDmin2,vsurf_EDmin3,vsurf_EWmin1,vsurf_EWmin2,vsurf_EWmin3,vsurf_G,vsurf_HB1,vsurf_HB2,vsurf_HB3,vsurf_HB4,vsurf_HB5,vsurf_HB6,vsurf_HB7,vsurf_HB8,vsurf_HL1,vsurf_HL2,vsurf_ID1,vsurf_ID2,vsurf_ID3,vsurf_ID4,vsurf_ID5,vsurf_ID6,vsurf_ID7,vsurf_ID8,vsurf_IW1,vsurf_IW2,vsurf_IW3,vsurf_IW4,vsurf_IW5,vsurf_IW6,vsurf_IW7,vsurf_IW8,vsurf_R,vsurf_S,vsurf_V,vsurf_W1,vsurf_W2,vsurf_W3,vsurf_W4,vsurf_W5,vsurf_W6,vsurf_W7,vsurf_W8,vsurf_Wp1,vsurf_Wp2,vsurf_Wp3,vsurf_Wp4,vsurf_Wp5,vsurf_Wp6,vsurf_Wp7,vsurf_Wp8 |

<sup>a</sup>Number of variables.

**Table S2.** Results of the Y-randomization test for selective regression models.

| Target | Descriptor | Average $q^2_{cv}$ | Average $RMSE_{cv}$ | Average $r^2$ | Average $RMSE$ |
|--------|------------|--------------------|---------------------|---------------|----------------|
| 1-2A   | BRS-3D     | 0.001              | 1.306               | -0.203        | 1.277          |
| 1-2B   | BRS-3D     | 0.003              | 1.478               | -0.353        | 1.250          |
| 1-3    | BRS-3D     | 0.002              | 1.607               | -0.202        | 1.653          |
| 2A-2B  | BRS-3D     | 0.003              | 1.370               | -0.095        | 1.407          |
| 2A-3   | BRS-3D     | 0.002              | 1.870               | -0.362        | 1.769          |
| 2B-3   | BRS-3D     | 0.005              | 1.824               | -0.125        | 1.814          |

$RMSE_{cv}$  and  $q^2_{cv}$  are root-mean-square error and squared correlation coefficients of 10-fold cross-validation for training sets, respectively.  $RMSE$  and  $r^2$  are root-mean-square error and determination coefficient for test sets, respectively.

**Table S3.** Three most important BRS-3D features for the six pairwise selectivity regression models.

| Targets | BRS_ID | Ligand_Name                          | PDB_ID | Classification           | Species                |
|---------|--------|--------------------------------------|--------|--------------------------|------------------------|
| 1-2A    | BRS158 | 1z41_FMN                             | 1z41   | Oxidoreductases          | Bacillus subtilis      |
|         | BRS258 | 2qu3_462                             | 2qu3   | Protease                 | Homo sapiens           |
|         | BRS156 | 2v7a_627                             | 2v7a   | Kinase                   | Homo sapiens           |
| 1-2B    | BRS5   | 1b6h_LYS_NVA_LYS                     | 1b6h   | Peptide binding protein  | Salmonella typhimurium |
|         | BRS59  | 1ywr_LI9                             | 1ywr   | Kinase                   | Mus musculus           |
|         | BRS132 | 3i9o_AVW                             | 3i9o   | Hydrolases               | Aplysia californica    |
| 1-3     | BRS135 | 2fgi_PD1                             | 2fgi   | Kinase                   | Homo sapiens           |
|         | BRS162 | 3lc3_IYX                             | 3lc3   | Protease                 | Homo sapiens           |
|         | BRS268 | 2wzy_SQX                             | 2wzy   | Ligand-gated ion channel | Aplysia californica    |
| 2A-2B   | BRS105 | 1r1h_BIR                             | 1r1h   | Protease                 | Homo sapiens           |
|         | BRS17  | 1j17_ZEN                             | 1j17   | Protease                 | Rattus norvegicus      |
|         | BRS266 | 2zog_BES                             | 2zog   | Protease                 | Mus musculus           |
| 2A-3    | BRS11  | 1eno_NAD                             | 1eno   | Oxidoreductases          | Brassica napus         |
|         | BRS162 | 3lc3_IYX                             | 3lc3   | Protease                 | Homo sapiens           |
|         | BRS236 | 2x2v_DPV                             | 2x2v   | Membrane protein         | Bacillus pseudofirmus  |
| 2B-3    | BRS136 | 1e14_CTZ                             | 1e14   | Calcium-binding protein  | Obelia longissima      |
|         | BRS141 | 1b8y_IN7                             | 1b8y   | Protease                 | Homo sapiens           |
|         | BRS206 | 3kti_OTT_PHE_SER_<br>PRO_ALA_MAA_MP8 | 3kti   | Protease                 | Bacillus subtilis      |

**Table S4.** The ligand structures of three most important BRS-3D features for the six pairwise selectivity regression models.

|       |                         |                         |                         |
|-------|-------------------------|-------------------------|-------------------------|
| 1-2A  | <b>BRS158(1z41)</b><br> | <b>BRS258(2qu3)</b><br> | <b>BRS156(2v7a)</b><br> |
| 1-2B  | <b>BRS5(1b6h)</b><br>   | <b>BRS59(1ywr)</b><br>  | <b>BRS132(3i9o)</b><br> |
| 1-3   | <b>BRS135(2fgi)</b><br> | <b>BRS162(3lc3)</b><br> | <b>BRS268(2wzy)</b><br> |
| 2A-2B | <b>BRS105(1r1h)</b><br> | <b>BRS17(1j17)</b><br>  | <b>BRS266(2zog)</b><br> |
| 2A-3  | <b>BRS11(1eno)</b><br>  | <b>BRS162(3lc3)</b><br> | <b>BRS236(2x2v)</b><br> |
| 2B-3  | <b>BRS136(1e14)</b><br> | <b>BRS141(1b8y)</b><br> | <b>BRS206(3kti)</b><br> |



### **Supplementary Dataset S1**

The dataset used in this study was provided separately as zipped SDF file.

The file contains all the information of adenosine receptor ligands, including ChEMID (Name), pKi values, selectivity ratio values and BRS-3D features.

The pKi values for each AR subtype are marked as pKi\_A1, pKi\_A2A, pKi\_A2B and pKi\_A3, respectively.

The SR values for each subtype pair are marked as SR\_A1-A2A, SR\_A1-A2B, SR\_A1-A3, SR\_A2A-A2B, SR\_A2A-A3 and SR\_A2B-A3, respectively.

BRS-3D scores of each compound are marked as BRS1, BRS2, BRS3 ... BRS300.
